# Supplementary material for: Selective Detection of Penicillin G Antibiotic in Milk by Molecularly Imprinted Polymer-Based Plasmonic SPR Sensor
Source: MDPI journal article supplement (doi:10.3390/biomimetics6040072), 2021-12-14
Supplement: s1 [file s1]

## Supplementary Material

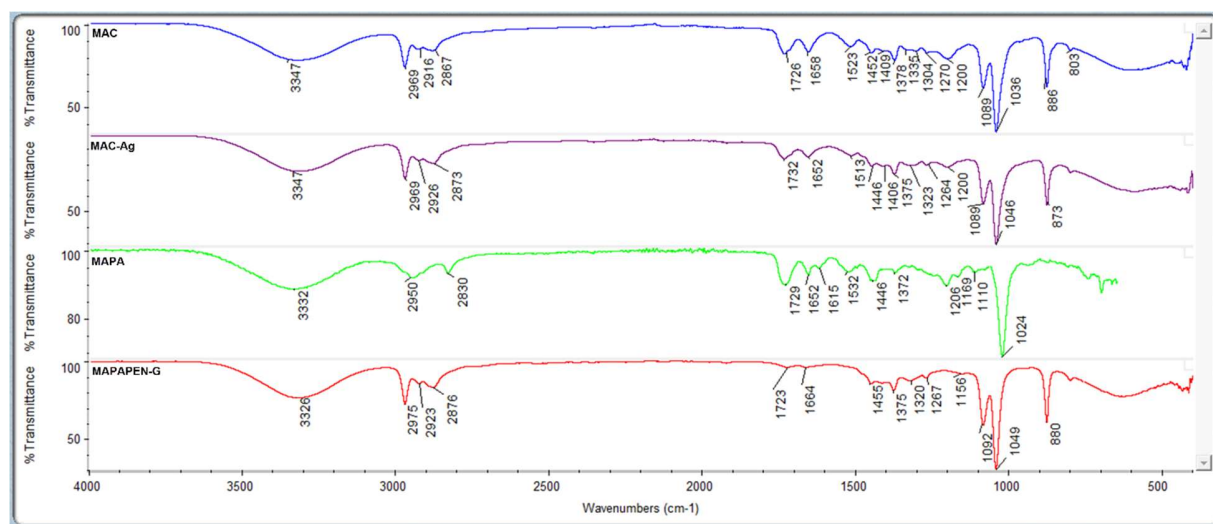

**Supplementary Figure S1.** FTIR-ATR spectrum of MAC monomer and MAC-Ag pre-complex; FTIR-ATR spectrum of MAPA monomer and MAPAPEN-G pre-complex.
